# Supplementary material
Source: ML conference proceedings conference paper supplement (https://proceedings.mlr.press/v97/alvi19a.html)
Supplement: Supplementary file [file alvi19a-supp.pdf]

---

# Supplementary material

---

Ahsan S. Alvi<sup>\*12</sup> Binxin Ru<sup>\*1</sup> Jan Calliess<sup>13</sup> Stephen J. Roberts<sup>123</sup> Michael A. Osborne<sup>12</sup>

## 1. Summary of experimental tasks

As mentioned in the main text, we conducted empirical evaluations on a large number of synthetic test problems:

- The tasks mat-2 and mat-6 refer to functions drawn from a Gaussian process(GP) with Matérn-52 kernel in  $\mathbb{R}^2$  and  $\mathbb{R}^6$  respectively.
- The global optimisation tasks<sup>1</sup> that we considered are the Ackley function defined on  $\mathbb{R}^5$  and  $\mathbb{R}^{10}$  (ack-5 and ack-10), the Michalewicz function defined on  $\mathbb{R}^5$  and  $\mathbb{R}^{10}$  (mic-5 and mic-10) and the Eggholder function in  $\mathbb{R}^2$  (egg-2).
- We also selected a robot pushing simulation experiment, which was first explored in a BO context by Wang & Jegelka (2017). Here the task is to learn the correct pushing action to minimise the distance of the robot to a goal. The problem has 4 inputs: the robot's location  $(r_x, r_y)$ , the angle of the pushing force  $r_\theta$  and the pushing duration  $t_r$ . We used the input space suggested by Wang & Jegelka (2017).

## 2. Asynchronous vs. synchronous parallel BO

Similar to Fig. 4 in the main text, Figs. 1 and 2 show head-to-head comparisons of synchronous and asynchronous methods, here on the ack-10 task.

## 3. Asynchronous BO

We conducted a large number of experiments testing the different approaches for asynchronous BO. We computed the mean and standard deviation of the log of the simple regret across 30 random initialisations (see Eq. 13 in the main text

---

<sup>\*</sup>Equal contribution <sup>1</sup>Department of Engineering Science, University of Oxford <sup>2</sup>Mind Foundry Ltd., Oxford, UK <sup>3</sup>Oxford-Man Institute of Quantitative Finance. Correspondence to: Binxin Ru <robin@robots.ox.ac.uk>, Ahsan Alvi <asa@robots.ox.ac.uk>.

*Proceedings of the 36<sup>th</sup> International Conference on Machine Learning*, Long Beach, California, PMLR 97, 2019. Copyright 2019 by the author(s).

<sup>1</sup>Details for these and other challenging global optimisation test functions can be found at <https://www.sfu.ca/~ssurjano/optimization.html>

for the definition). Tables 1, 2 and 3 show the results after 50, 75 and 100 asynchronous BO steps respectively.

Across all of these experiments, we can see that PLAyBOOK is performing competitively, making it an attractive choice for asynchronous BO problems.

## References

Wang, Z. and Jegelka, S. Max-value entropy search for efficient Bayesian optimization. In *International Conference on Machine Learning (ICML)*, 2017.

| k        | Task         | KB                 | TS                  | PLAYBOOK            |                     |                     |                     |
|----------|--------------|--------------------|---------------------|---------------------|---------------------|---------------------|---------------------|
|          |              |                    |                     | L                   | LL                  | H                   | HL                  |
| 2        | ack-10       | -0.30 (0.16)       | -0.01 (0.03)        | -0.23 (0.15)        | <b>-0.37 (0.25)</b> | -0.32 (0.18)        | -0.27 (0.18)        |
|          | ack-5        | -0.55 (0.39)       | -0.22 (0.20)        | <b>-0.85 (0.52)</b> | -0.52 (0.40)        | -0.64 (0.39)        | -0.71 (0.48)        |
|          | egg-2        | 0.28 (0.72)        | 0.89 (0.92)         | -0.12 (1.26)        | -0.05 (1.03)        | <b>-0.44 (2.13)</b> | -0.31 (1.62)        |
|          | mat-2        | 0.81 (0.30)        | 1.05 (0.26)         | <b>0.78 (0.28)</b>  | 0.82 (0.26)         | 0.81 (0.21)         | 0.89 (0.20)         |
|          | mat-6        | 1.02 (0.16)        | 1.13 (0.14)         | <b>0.85 (0.43)</b>  | 0.92 (0.33)         | 0.88 (0.26)         | 0.86 (0.31)         |
|          | mic-10       | 1.84 (0.08)        | 1.92 (0.07)         | <b>1.78 (0.11)</b>  | 1.80 (0.09)         | 1.82 (0.11)         | 1.83 (0.10)         |
|          | mic-5        | 0.71 (0.28)        | 1.02 (0.13)         | 0.67 (0.27)         | <b>0.66 (0.26)</b>  | 0.69 (0.33)         | 0.87 (0.16)         |
| nrobot-4 | -0.71 (1.05) | -0.52 (1.21)       | -0.88 (0.91)        | -0.78 (0.86)        | <b>-0.89 (0.69)</b> | -0.87 (0.91)        |                     |
| 4        | ack-10       | -0.29 (0.17)       | -0.01 (0.03)        | -0.26 (0.16)        | -0.32 (0.17)        | -0.25 (0.14)        | <b>-0.34 (0.18)</b> |
|          | ack-5        | -0.54 (0.36)       | -0.21 (0.13)        | -0.66 (0.45)        | -0.41 (0.27)        | -0.53 (0.41)        | <b>-0.71 (0.52)</b> |
|          | egg-2        | 0.19 (1.06)        | 0.79 (0.92)         | 0.53 (0.91)         | 0.23 (0.98)         | 0.29 (0.86)         | <b>-0.06 (1.26)</b> |
|          | mat-2        | <b>0.77 (0.30)</b> | 0.98 (0.37)         | 0.94 (0.22)         | 1.01 (0.28)         | 0.82 (0.25)         | 0.87 (0.22)         |
|          | mat-6        | 1.06 (0.17)        | 1.13 (0.05)         | 0.99 (0.18)         | 1.01 (0.26)         | 0.95 (0.23)         | <b>0.94 (0.20)</b>  |
|          | mic-10       | 1.82 (0.11)        | 1.92 (0.07)         | 1.82 (0.08)         | 1.83 (0.08)         | <b>1.78 (0.09)</b>  | 1.80 (0.08)         |
|          | mic-5        | <b>0.66 (0.28)</b> | 1.01 (0.16)         | 0.78 (0.23)         | 0.87 (0.19)         | 0.76 (0.20)         | 0.82 (0.33)         |
| nrobot-4 | -0.67 (1.00) | -0.39 (1.04)       | <b>-1.01 (0.94)</b> | -0.94 (0.97)        | -0.75 (0.70)        | -0.63 (0.79)        |                     |
| 6        | ack-10       | -0.24 (0.19)       | -0.01 (0.04)        | -0.29 (0.15)        | -0.25 (0.14)        | -0.20 (0.14)        | <b>-0.31 (0.16)</b> |
|          | ack-5        | -0.51 (0.28)       | -0.20 (0.20)        | <b>-0.54 (0.40)</b> | -0.27 (0.18)        | -0.35 (0.24)        | -0.49 (0.27)        |
|          | egg-2        | 0.37 (1.05)        | 0.78 (0.88)         | 0.71 (0.83)         | 0.77 (0.82)         | <b>0.07 (1.25)</b>  | 0.32 (1.11)         |
|          | mat-2        | 0.85 (0.25)        | 1.04 (0.19)         | 0.98 (0.34)         | 1.06 (0.23)         | <b>0.84 (0.23)</b>  | 0.85 (0.25)         |
|          | mat-6        | 1.01 (0.17)        | 1.07 (0.18)         | <b>0.95 (0.28)</b>  | 1.02 (0.28)         | 1.03 (0.16)         | 0.99 (0.24)         |
|          | mic-10       | 1.84 (0.08)        | 1.92 (0.07)         | 1.84 (0.08)         | 1.81 (0.08)         | 1.84 (0.08)         | <b>1.80 (0.09)</b>  |
|          | mic-5        | <b>0.76 (0.21)</b> | 1.04 (0.15)         | 0.84 (0.23)         | 0.89 (0.24)         | 0.88 (0.19)         | 0.87 (0.20)         |
| nrobot-4 | -0.58 (0.96) | -0.22 (0.95)       | <b>-0.69 (1.04)</b> | -0.47 (0.85)        | -0.63 (1.02)        | -0.51 (0.99)        |                     |
| 8        | ack-10       | -0.23 (0.17)       | -0.01 (0.03)        | -0.26 (0.17)        | -0.34 (0.15)        | -0.17 (0.11)        | <b>-0.40 (0.14)</b> |
|          | ack-5        | -0.44 (0.27)       | -0.19 (0.14)        | -0.65 (0.40)        | -0.33 (0.21)        | -0.38 (0.30)        | <b>-0.68 (0.37)</b> |
|          | egg-2        | 0.31 (0.93)        | 0.65 (0.92)         | 0.60 (1.20)         | 0.93 (0.77)         | 0.42 (0.61)         | <b>0.17 (1.05)</b>  |
|          | mat-2        | 0.80 (0.22)        | 0.93 (0.26)         | 0.81 (0.44)         | 1.09 (0.20)         | 0.87 (0.27)         | <b>0.79 (0.30)</b>  |
|          | mat-6        | <b>1.01 (0.19)</b> | 1.13 (0.06)         | 1.03 (0.17)         | 1.02 (0.22)         | 1.03 (0.15)         | 1.03 (0.20)         |
|          | mic-10       | 1.84 (0.09)        | 1.91 (0.07)         | 1.82 (0.08)         | 1.81 (0.10)         | 1.80 (0.13)         | <b>1.78 (0.08)</b>  |
|          | mic-5        | 0.70 (0.33)        | 1.02 (0.20)         | <b>0.68 (0.32)</b>  | 0.79 (0.25)         | 0.73 (0.32)         | 0.69 (0.32)         |
| nrobot-4 | -0.61 (0.78) | -0.20 (0.96)       | <b>-0.94 (0.92)</b> | -0.62 (1.14)        | -0.76 (1.11)        | -0.39 (0.73)        |                     |
| 16       | ack-10       | -0.13 (0.08)       | -0.02 (0.04)        | -0.24 (0.13)        | -0.24 (0.13)        | -0.22 (0.10)        | <b>-0.44 (0.13)</b> |
|          | ack-5        | -0.36 (0.30)       | -0.18 (0.16)        | -0.49 (0.34)        | -0.36 (0.24)        | -0.28 (0.19)        | <b>-0.73 (0.26)</b> |
|          | egg-2        | 0.58 (0.73)        | 0.56 (1.10)         | 1.04 (0.51)         | 1.22 (0.50)         | <b>0.30 (0.96)</b>  | 0.71 (0.53)         |
|          | mat-2        | <b>0.82 (0.27)</b> | 0.89 (0.24)         | 1.07 (0.17)         | 1.12 (0.20)         | 0.92 (0.31)         | 0.90 (0.31)         |
|          | mat-6        | 1.10 (0.05)        | 1.14 (0.03)         | 1.05 (0.14)         | 1.06 (0.21)         | 1.02 (0.26)         | <b>1.00 (0.26)</b>  |
|          | mic-10       | 1.86 (0.08)        | 1.90 (0.07)         | 1.82 (0.07)         | 1.82 (0.09)         | 1.83 (0.08)         | <b>1.79 (0.09)</b>  |
|          | mic-5        | <b>0.81 (0.25)</b> | 1.02 (0.19)         | 0.85 (0.21)         | 0.84 (0.23)         | 0.81 (0.22)         | 0.82 (0.25)         |
| nrobot-4 | -0.43 (0.94) | -0.22 (0.99)       | <b>-0.78 (0.95)</b> | -0.14 (0.77)        | -0.37 (0.80)        | -0.40 (0.81)        |                     |

Table 1. Mean and standard deviation of the log(regret) after 50 steps of asynchronous BO.

| k        | Task         | KB                  | TS                  | PLAYBOOK            |                     |                     |                     |
|----------|--------------|---------------------|---------------------|---------------------|---------------------|---------------------|---------------------|
|          |              |                     |                     | L                   | LL                  | H                   | HL                  |
| 2        | ack-10       | -0.43 (0.18)        | -0.01 (0.03)        | -0.48 (0.27)        | <b>-0.58 (0.26)</b> | -0.55 (0.32)        | -0.45 (0.28)        |
|          | ack-5        | -0.91 (0.56)        | -0.32 (0.22)        | <b>-1.15 (0.58)</b> | -0.76 (0.50)        | -1.03 (0.52)        | -0.92 (0.51)        |
|          | egg-2        | -0.12 (0.92)        | 0.87 (0.91)         | -0.59 (1.16)        | <b>-1.13 (2.14)</b> | -0.81 (1.99)        | -0.82 (1.68)        |
|          | mat-2        | 0.80 (0.30)         | 1.05 (0.27)         | <b>0.76 (0.28)</b>  | 0.81 (0.26)         | 0.81 (0.21)         | 0.87 (0.20)         |
|          | mat-6        | 0.95 (0.21)         | 1.17 (0.14)         | <b>0.74 (0.53)</b>  | 0.87 (0.31)         | 0.84 (0.34)         | 0.89 (0.29)         |
|          | mic-10       | 1.79 (0.12)         | 1.92 (0.07)         | <b>1.75 (0.11)</b>  | 1.76 (0.14)         | 1.79 (0.12)         | 1.79 (0.13)         |
|          | mic-5        | <b>0.52 (0.42)</b>  | 0.97 (0.17)         | 0.61 (0.29)         | 0.56 (0.24)         | 0.57 (0.37)         | 0.73 (0.28)         |
| nrobot-4 | -1.06 (1.08) | -0.83 (1.18)        | -1.20 (0.86)        | <b>-1.31 (0.75)</b> | -1.24 (0.78)        | -1.29 (0.80)        |                     |
| 4        | ack-10       | <b>-0.52 (0.21)</b> | -0.01 (0.03)        | -0.51 (0.27)        | -0.42 (0.19)        | -0.46 (0.22)        | -0.50 (0.22)        |
|          | ack-5        | -0.83 (0.48)        | -0.31 (0.23)        | <b>-1.10 (0.53)</b> | -0.57 (0.33)        | -0.75 (0.62)        | -0.90 (0.54)        |
|          | egg-2        | -0.19 (0.87)        | 0.69 (1.13)         | 0.16 (1.70)         | -0.81 (2.55)        | -0.23 (1.10)        | <b>-0.89 (2.48)</b> |
|          | mat-2        | <b>0.75 (0.29)</b>  | 0.98 (0.37)         | 0.93 (0.22)         | 1.01 (0.28)         | 0.80 (0.25)         | 0.85 (0.22)         |
|          | mat-6        | 0.97 (0.27)         | 1.18 (0.06)         | 0.95 (0.23)         | 1.02 (0.24)         | <b>0.86 (0.28)</b>  | 0.87 (0.30)         |
|          | mic-10       | 1.77 (0.12)         | 1.92 (0.07)         | 1.77 (0.09)         | 1.78 (0.09)         | <b>1.74 (0.09)</b>  | 1.77 (0.10)         |
|          | mic-5        | <b>0.56 (0.30)</b>  | 0.97 (0.14)         | 0.69 (0.25)         | 0.76 (0.19)         | 0.63 (0.22)         | 0.67 (0.34)         |
| nrobot-4 | -0.92 (0.95) | -1.01 (1.31)        | <b>-1.51 (0.88)</b> | -1.23 (0.89)        | -1.07 (0.68)        | -1.04 (0.79)        |                     |
| 6        | ack-10       | -0.41 (0.22)        | -0.01 (0.04)        | <b>-0.50 (0.26)</b> | -0.30 (0.15)        | -0.32 (0.18)        | -0.38 (0.19)        |
|          | ack-5        | -0.83 (0.46)        | -0.32 (0.23)        | <b>-0.86 (0.54)</b> | -0.36 (0.23)        | -0.52 (0.31)        | -0.76 (0.37)        |
|          | egg-2        | 0.19 (1.00)         | 0.64 (1.14)         | 0.56 (0.93)         | 0.75 (0.84)         | <b>-0.34 (1.48)</b> | -0.21 (1.03)        |
|          | mat-2        | <b>0.82 (0.26)</b>  | 1.03 (0.20)         | 0.98 (0.34)         | 1.06 (0.23)         | 0.82 (0.22)         | 0.84 (0.25)         |
|          | mat-6        | 0.92 (0.25)         | 1.14 (0.17)         | <b>0.86 (0.36)</b>  | 1.08 (0.25)         | 0.95 (0.28)         | 0.94 (0.26)         |
|          | mic-10       | 1.81 (0.08)         | 1.92 (0.07)         | 1.81 (0.08)         | 1.79 (0.09)         | 1.80 (0.10)         | <b>1.78 (0.10)</b>  |
|          | mic-5        | <b>0.63 (0.28)</b>  | 1.00 (0.14)         | 0.74 (0.29)         | 0.82 (0.22)         | 0.76 (0.26)         | 0.69 (0.33)         |
| nrobot-4 | -1.02 (0.88) | -0.73 (1.20)        | -0.99 (1.04)        | -0.78 (0.96)        | <b>-1.04 (1.02)</b> | -1.02 (0.95)        |                     |
| 8        | ack-10       | -0.44 (0.21)        | -0.01 (0.03)        | -0.47 (0.21)        | -0.40 (0.20)        | -0.28 (0.17)        | <b>-0.52 (0.16)</b> |
|          | ack-5        | -0.77 (0.40)        | -0.33 (0.20)        | <b>-1.04 (0.45)</b> | -0.39 (0.22)        | -0.52 (0.41)        | -0.92 (0.36)        |
|          | egg-2        | <b>-0.11 (0.96)</b> | 0.57 (1.00)         | 0.40 (1.22)         | 0.85 (0.84)         | 0.22 (0.51)         | -0.05 (0.96)        |
|          | mat-2        | 0.78 (0.23)         | 0.91 (0.26)         | 0.81 (0.44)         | 1.09 (0.20)         | 0.82 (0.26)         | <b>0.76 (0.30)</b>  |
|          | mat-6        | 0.95 (0.24)         | 1.18 (0.10)         | 0.97 (0.20)         | 1.10 (0.20)         | <b>0.93 (0.25)</b>  | 0.97 (0.28)         |
|          | mic-10       | 1.80 (0.09)         | 1.91 (0.07)         | <b>1.75 (0.09)</b>  | 1.78 (0.09)         | 1.78 (0.13)         | 1.76 (0.08)         |
|          | mic-5        | 0.58 (0.38)         | 0.98 (0.19)         | 0.59 (0.36)         | 0.70 (0.26)         | 0.61 (0.33)         | <b>0.55 (0.53)</b>  |
| nrobot-4 | -0.92 (0.89) | -0.65 (1.01)        | <b>-1.25 (0.82)</b> | -0.92 (1.08)        | -1.07 (1.10)        | -0.92 (0.88)        |                     |
| 16       | ack-10       | -0.27 (0.14)        | -0.02 (0.04)        | -0.43 (0.21)        | -0.31 (0.20)        | -0.31 (0.14)        | <b>-0.54 (0.16)</b> |
|          | ack-5        | -0.55 (0.34)        | -0.29 (0.19)        | -0.77 (0.42)        | -0.39 (0.25)        | -0.39 (0.28)        | <b>-0.94 (0.30)</b> |
|          | egg-2        | 0.26 (0.74)         | 0.41 (1.18)         | 0.89 (0.63)         | 1.21 (0.50)         | <b>-0.39 (1.81)</b> | 0.42 (0.61)         |
|          | mat-2        | <b>0.79 (0.27)</b>  | 0.88 (0.24)         | 1.07 (0.17)         | 1.12 (0.20)         | 0.87 (0.30)         | 0.86 (0.31)         |
|          | mat-6        | 1.03 (0.20)         | 1.20 (0.03)         | 0.95 (0.21)         | 1.08 (0.25)         | <b>0.94 (0.26)</b>  | 0.96 (0.36)         |
|          | mic-10       | 1.83 (0.09)         | 1.90 (0.07)         | 1.79 (0.08)         | 1.79 (0.09)         | 1.79 (0.10)         | <b>1.75 (0.13)</b>  |
|          | mic-5        | <b>0.66 (0.27)</b>  | 0.95 (0.21)         | 0.77 (0.25)         | 0.73 (0.39)         | 0.75 (0.23)         | 0.75 (0.25)         |
| nrobot-4 | -0.72 (0.87) | -0.80 (1.24)        | <b>-1.00 (1.01)</b> | -0.61 (0.95)        | -0.72 (0.61)        | -0.79 (0.78)        |                     |

Table 2. Mean and standard deviation of the log(regret) after 75 steps of asynchronous BO.

| k  | Task     | KB                  | TS           | PLAYBOOK            |                     |                     |                     |
|----|----------|---------------------|--------------|---------------------|---------------------|---------------------|---------------------|
|    |          |                     |              | L                   | LL                  | H                   | HL                  |
| 2  | ack-10   | -0.67 (0.27)        | -0.01 (0.03) | -0.72 (0.34)        | -0.73 (0.29)        | <b>-0.80 (0.35)</b> | -0.58 (0.26)        |
|    | ack-5    | -1.28 (0.70)        | -0.35 (0.22) | <b>-1.49 (0.65)</b> | -0.95 (0.53)        | -1.39 (0.62)        | -1.08 (0.47)        |
|    | egg-2    | -0.42 (1.62)        | 0.80 (0.92)  | -1.10 (1.56)        | <b>-1.58 (2.49)</b> | -1.54 (2.28)        | -1.30 (2.01)        |
|    | mat-2    | 0.79 (0.30)         | 1.04 (0.25)  | <b>0.76 (0.28)</b>  | 0.81 (0.26)         | 0.81 (0.21)         | 0.87 (0.19)         |
|    | mat-6    | 1.00 (0.21)         | 1.27 (0.17)  | <b>0.93 (0.36)</b>  | 1.00 (0.31)         | 0.94 (0.26)         | 1.01 (0.27)         |
|    | mic-10   | 1.76 (0.13)         | 1.92 (0.07)  | <b>1.72 (0.10)</b>  | 1.73 (0.13)         | 1.72 (0.13)         | 1.76 (0.12)         |
|    | mic-5    | <b>0.39 (0.51)</b>  | 0.94 (0.18)  | 0.54 (0.31)         | 0.45 (0.24)         | 0.45 (0.36)         | 0.65 (0.28)         |
| 4  | nrobot-4 | -1.33 (1.02)        | -1.12 (1.21) | -1.54 (0.84)        | -1.51 (0.85)        | -1.46 (0.74)        | <b>-1.58 (0.78)</b> |
|    | ack-10   | <b>-0.72 (0.24)</b> | -0.01 (0.03) | -0.68 (0.28)        | -0.54 (0.24)        | -0.67 (0.24)        | -0.56 (0.24)        |
|    | ack-5    | -1.13 (0.59)        | -0.41 (0.25) | <b>-1.46 (0.59)</b> | -0.68 (0.32)        | -0.98 (0.73)        | -1.04 (0.52)        |
|    | egg-2    | -0.27 (0.82)        | 0.65 (1.12)  | -0.16 (1.71)        | -1.09 (2.57)        | -0.50 (1.03)        | <b>-1.17 (2.53)</b> |
|    | mat-2    | <b>0.74 (0.29)</b>  | 0.98 (0.37)  | 0.93 (0.22)         | 1.01 (0.28)         | 0.79 (0.25)         | 0.85 (0.22)         |
|    | mat-6    | 1.03 (0.25)         | 1.30 (0.06)  | 1.07 (0.19)         | 1.12 (0.20)         | <b>0.98 (0.25)</b>  | 1.01 (0.23)         |
|    | mic-10   | 1.74 (0.11)         | 1.92 (0.07)  | 1.75 (0.09)         | 1.74 (0.10)         | <b>1.70 (0.09)</b>  | 1.74 (0.11)         |
| 6  | mic-5    | <b>0.44 (0.32)</b>  | 0.96 (0.14)  | 0.55 (0.27)         | 0.63 (0.21)         | 0.50 (0.27)         | 0.63 (0.34)         |
|    | nrobot-4 | -1.14 (0.88)        | -1.24 (1.23) | <b>-1.73 (0.88)</b> | -1.48 (0.72)        | -1.32 (0.83)        | -1.24 (0.83)        |
|    | ack-10   | -0.63 (0.27)        | -0.01 (0.04) | <b>-0.65 (0.29)</b> | -0.37 (0.20)        | -0.44 (0.25)        | -0.43 (0.20)        |
|    | ack-5    | <b>-1.19 (0.60)</b> | -0.39 (0.26) | -1.17 (0.65)        | -0.39 (0.22)        | -0.68 (0.41)        | -0.87 (0.40)        |
|    | egg-2    | -0.18 (1.05)        | 0.57 (1.15)  | 0.50 (0.94)         | 0.65 (0.98)         | <b>-0.53 (1.40)</b> | -0.45 (0.99)        |
|    | mat-2    | 0.82 (0.25)         | 1.02 (0.20)  | 0.98 (0.34)         | 1.06 (0.23)         | <b>0.81 (0.22)</b>  | 0.83 (0.24)         |
|    | mat-6    | 1.02 (0.24)         | 1.25 (0.16)  | <b>0.99 (0.28)</b>  | 1.18 (0.27)         | 1.05 (0.23)         | 1.03 (0.23)         |
| 8  | mic-10   | 1.77 (0.10)         | 1.92 (0.07)  | <b>1.76 (0.08)</b>  | 1.76 (0.08)         | 1.76 (0.13)         | 1.77 (0.10)         |
|    | mic-5    | <b>0.51 (0.34)</b>  | 0.96 (0.15)  | 0.66 (0.27)         | 0.72 (0.25)         | 0.66 (0.37)         | 0.63 (0.30)         |
|    | nrobot-4 | -1.27 (0.80)        | -1.12 (1.28) | -1.24 (0.89)        | -1.03 (0.94)        | <b>-1.35 (0.95)</b> | -1.27 (1.00)        |
|    | ack-10   | -0.57 (0.22)        | -0.01 (0.03) | -0.62 (0.26)        | -0.44 (0.23)        | -0.41 (0.25)        | <b>-0.63 (0.16)</b> |
|    | ack-5    | -1.16 (0.47)        | -0.42 (0.24) | <b>-1.32 (0.46)</b> | -0.47 (0.23)        | -0.70 (0.51)        | -1.12 (0.41)        |
|    | egg-2    | -0.24 (0.91)        | 0.42 (1.13)  | -0.02 (2.20)        | 0.78 (0.86)         | -0.04 (0.54)        | <b>-0.27 (0.85)</b> |
|    | mat-2    | 0.78 (0.23)         | 0.90 (0.25)  | 0.81 (0.44)         | 1.09 (0.20)         | 0.81 (0.26)         | <b>0.75 (0.30)</b>  |
| 16 | mat-6    | <b>1.01 (0.23)</b>  | 1.30 (0.09)  | 1.07 (0.17)         | 1.23 (0.17)         | 1.02 (0.19)         | 1.04 (0.25)         |
|    | mic-10   | 1.78 (0.08)         | 1.91 (0.07)  | <b>1.72 (0.10)</b>  | 1.75 (0.09)         | 1.74 (0.13)         | 1.74 (0.08)         |
|    | mic-5    | <b>0.46 (0.37)</b>  | 0.93 (0.19)  | 0.53 (0.35)         | 0.68 (0.26)         | 0.50 (0.32)         | 0.50 (0.52)         |
|    | nrobot-4 | -1.24 (0.76)        | -1.18 (1.23) | <b>-1.44 (0.84)</b> | -1.17 (0.98)        | -1.35 (1.02)        | -1.13 (0.85)        |
|    | ack-10   | -0.44 (0.20)        | -0.02 (0.04) | <b>-0.63 (0.24)</b> | -0.37 (0.18)        | -0.40 (0.18)        | -0.61 (0.16)        |
|    | ack-5    | -0.83 (0.43)        | -0.41 (0.23) | -1.03 (0.51)        | -0.41 (0.24)        | -0.43 (0.30)        | <b>-1.11 (0.35)</b> |
|    | egg-2    | -0.41 (2.18)        | 0.34 (1.17)  | 0.83 (0.67)         | 1.21 (0.49)         | <b>-0.86 (2.23)</b> | -0.53 (2.03)        |
| 16 | mat-2    | <b>0.79 (0.26)</b>  | 0.88 (0.24)  | 1.07 (0.16)         | 1.12 (0.20)         | 0.86 (0.29)         | 0.83 (0.31)         |
|    | mat-6    | 1.09 (0.18)         | 1.31 (0.04)  | 1.02 (0.21)         | 1.21 (0.20)         | <b>1.01 (0.23)</b>  | 1.02 (0.42)         |
|    | mic-10   | 1.80 (0.11)         | 1.90 (0.07)  | 1.75 (0.09)         | 1.77 (0.10)         | 1.76 (0.10)         | <b>1.72 (0.13)</b>  |
|    | mic-5    | <b>0.53 (0.33)</b>  | 0.91 (0.21)  | 0.68 (0.25)         | 0.67 (0.38)         | 0.66 (0.28)         | 0.60 (0.36)         |
|    | nrobot-4 | -1.10 (0.86)        | -1.15 (1.20) | <b>-1.39 (0.95)</b> | -0.95 (1.02)        | -0.86 (0.60)        | -1.07 (0.92)        |

Table 3. Mean and standard deviation of the log(regret) after 100 steps of asynchronous BO.

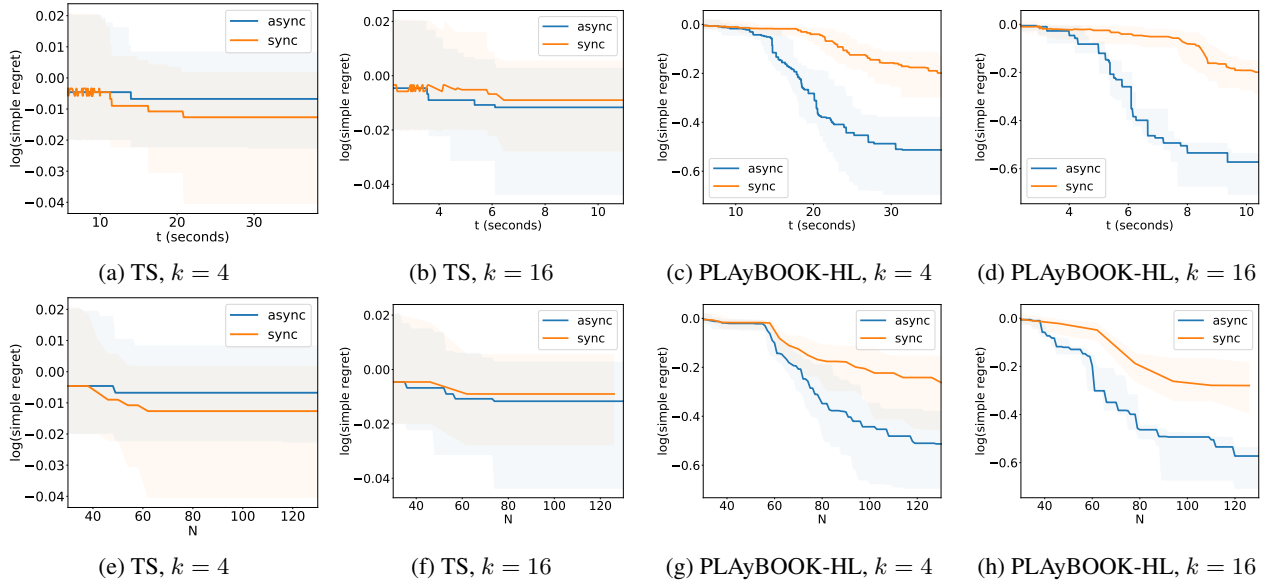

Figure 1. Head-to-head comparison on ack-10

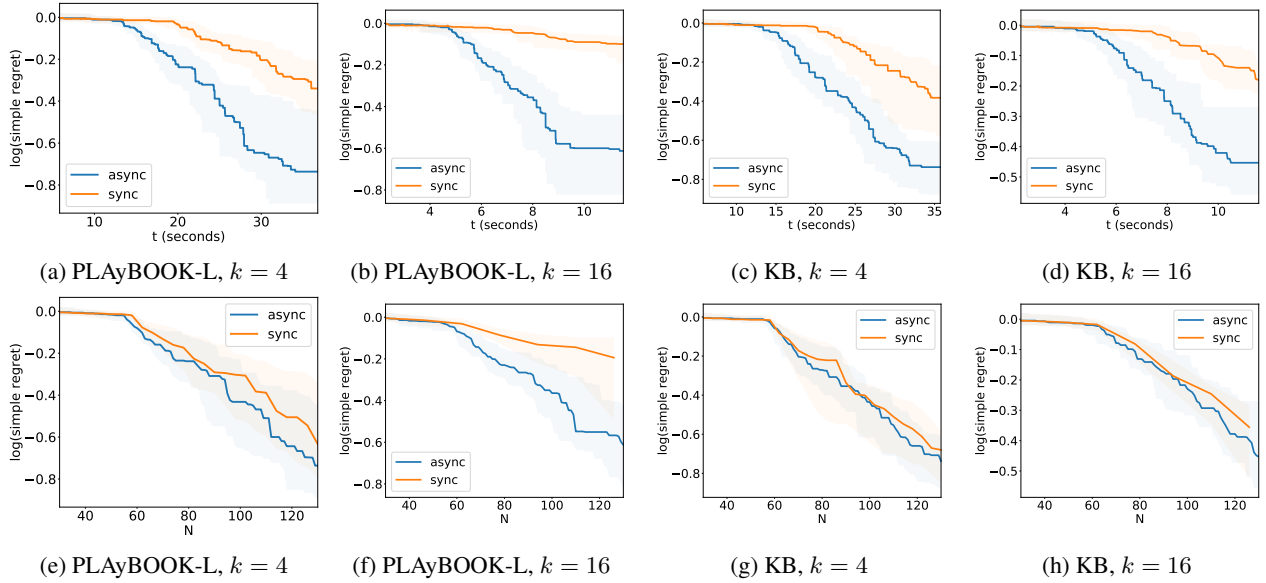

Figure 2. Head-to-head comparison on ack-10
